# Supplementary material for: A multifunctional helical Cu(i) coordination polymer with mechanochromic, sensing and photocatalytic properties
Source: Royal Society of Chemistry journal article supplement (doi:10.1039/c3cc42241k), 2013-01-01
Supplement: c3cc42241k.pdf [file c3cc42241k.pdf]

*Electronic Supplementary Information (ESI) for*

## **Multifunctional Helical Cu(I) Coordination Polymer with Mechanochromic, Sensing and Photocatalytic Properties**

Tian Wen, De-Xiang Zhang, Juan Liu, Rui Lin, Jian Zhang\*

*State Key Laboratory of Structural Chemistry, Fujian Institute of Research on the  
Structure of Matter, the Chinese Academy of Sciences, Fuzhou, Fujian 350002, P. R.*

*China. E-mail: zhj@fjirsm.ac.cn .*

### *Experimental Section*

**Photocatalytic experiments:** The evaluation of photocatalytic activities of the samples for the photocatalytic decolorization of organic dyes was performed at ambient temperature (25°C). The procedure was as follows: 0.030 g of sample was dispersed into 10mL of methyl blue aqueous solution (18.6735mg L<sup>-1</sup>), followed by the addition of five drops of hydrogen peroxide solution (H<sub>2</sub>O<sub>2</sub> 30%). A 500 W xenon arc lamp was used as a light source. Visible light then irradiated the above solutions. During the degradation, the mixture was stirred continuously by means of a magnetic stirrer. The samples were withdrawn regularly from the reactor, and dispersed powders were removed by centrifugation. At different time intervals, analytical samples were withdrawn and analyzed by UV/Vis spectroscopy. The degradation of MO and RhB were prepared using the method similar to that of MB except replacing MB solvent with MO aqueous solution (18.6735mg L<sup>-1</sup>) and RhB aqueous solution (18.6735mg L<sup>-1</sup>).

The band gap sizes of polymer were investigated by UV-vis diffuse reflection measurement method at room temperature. The  $\alpha h\nu^2$  vs  $h\nu$  curves for products are shown in Figure S4. According to the equation  $\alpha h\nu^2 = K(h\nu - E_g)^{1/2}$  (where  $\alpha$  is the absorption coefficient,  $h\nu$  is the discrete photo energy,  $K$  is a constant, and  $E_g$  is the band gap energy), the extrapolated value (the straight lines to the  $x$  axis) of  $h\nu$  at  $\alpha = 0$  give absorption edge energies corresponding to  $E_g = 2.49\text{eV}$  for the compound.<sup>[1,2]</sup>

#### References:

- [1] S. Tsunekawa, T. Fukuda, A. Kasuya, *J. Appl. Phys.* 2000, 87, 1318.
- [2] A. L. Linsebigler, G. Q. LU, J. T. Yates, *Chem. Rev.* 1995, 95, 735.

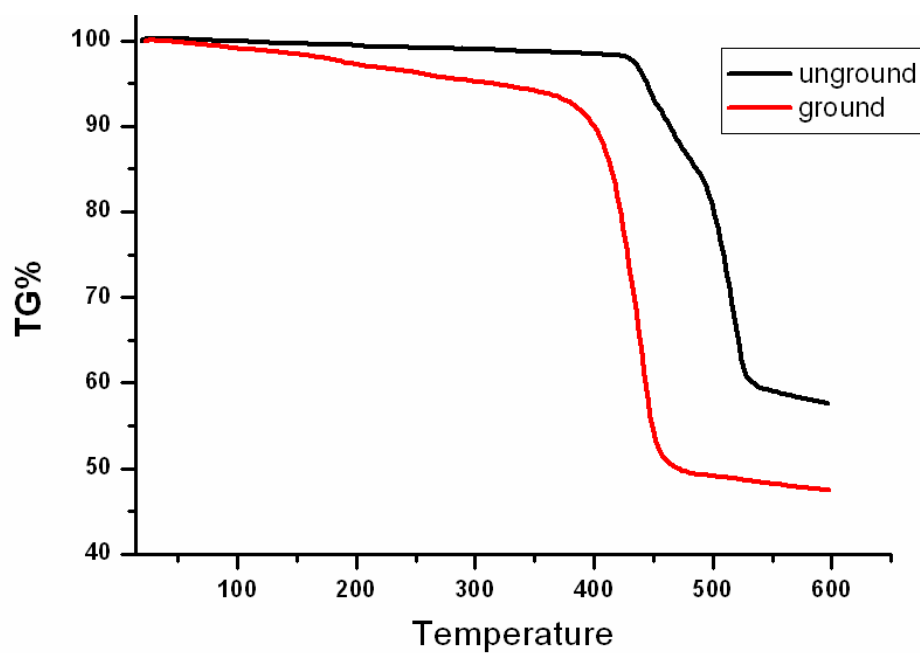

**Fig. S1** Thermogravimetric analyses of **1** and its ground sample.

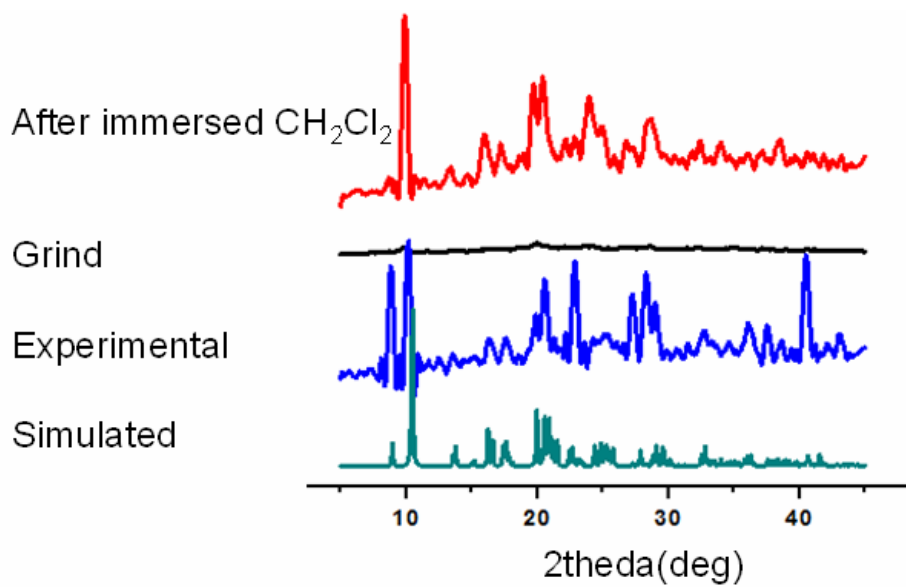

**Fig. S2** The PXRD patterns of **1** under different conditions.

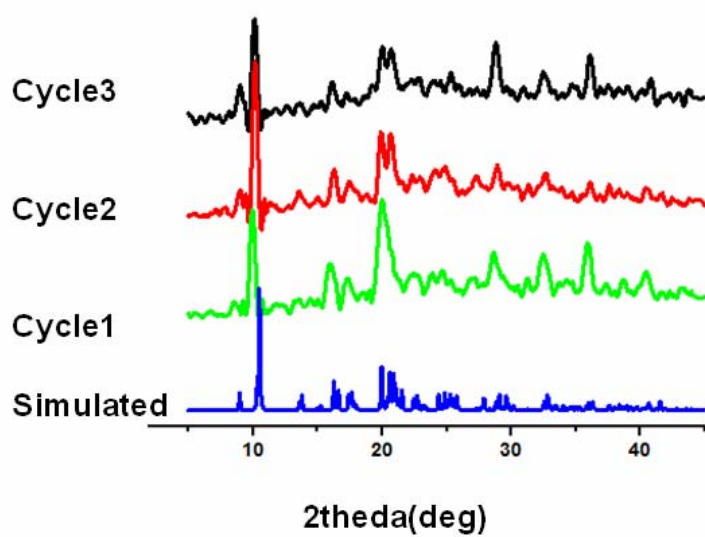

**Fig. S3** The PXRD patterns of **1** under different conditions.

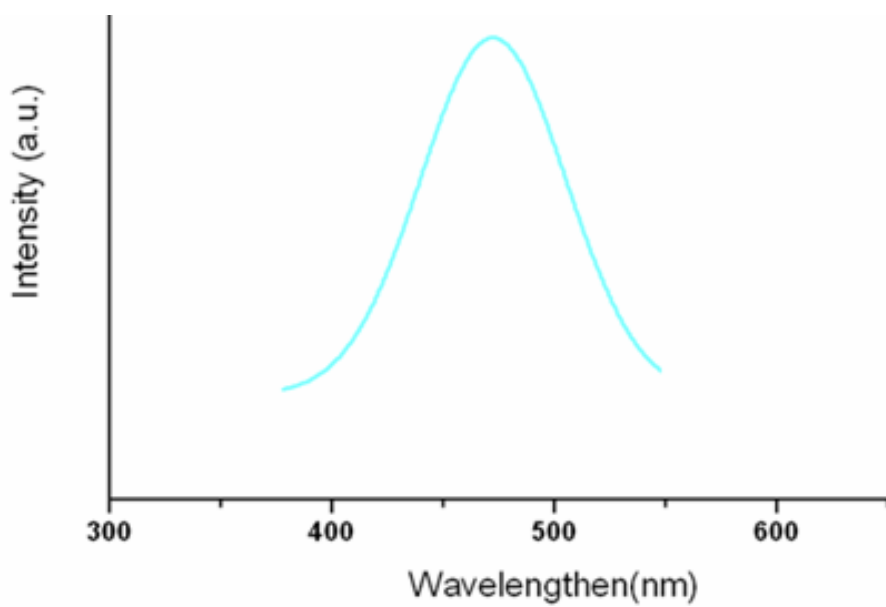

**Fig. S4** PL spectra of the dm-bim ligand under  $\lambda_{ex}$ = 365 nm.

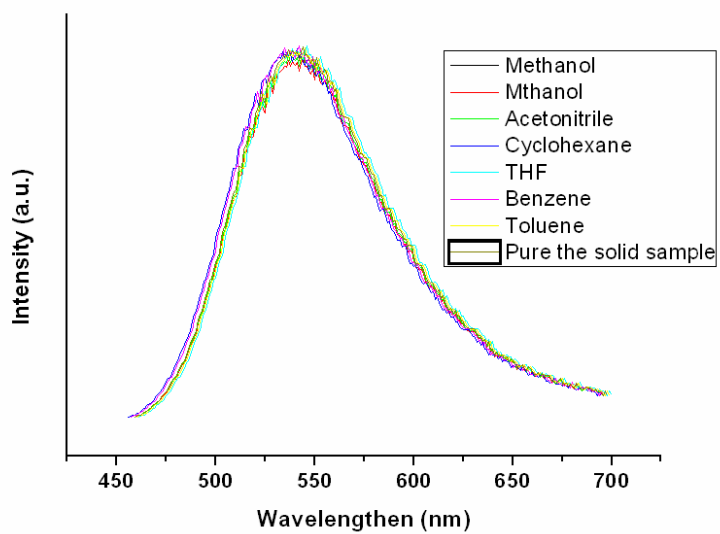

**Fig. S5** PL spectra of the sample quenching response to different solvent and pure the solid sample under  $\lambda_{ex}=365$  nm.

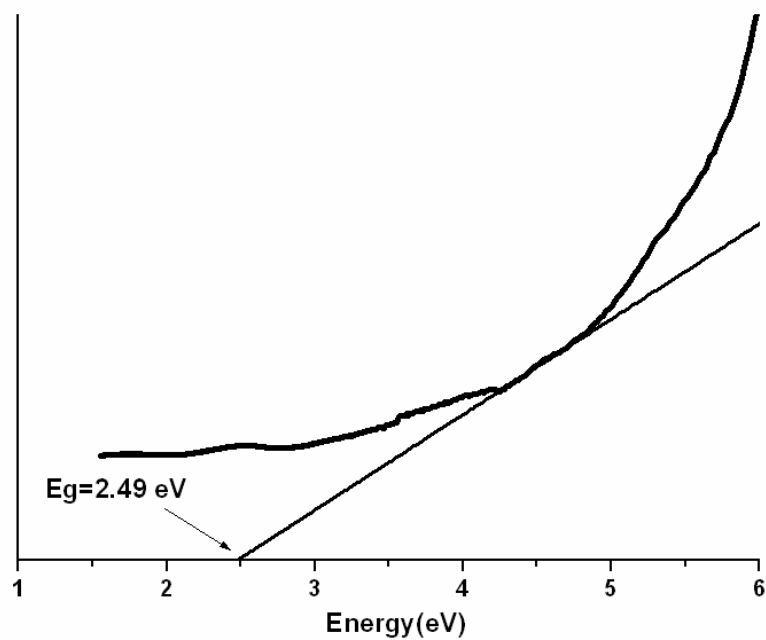

**Fig. S6** The  $\alpha h\nu^2$  vs  $h\nu$  curve of **1**.

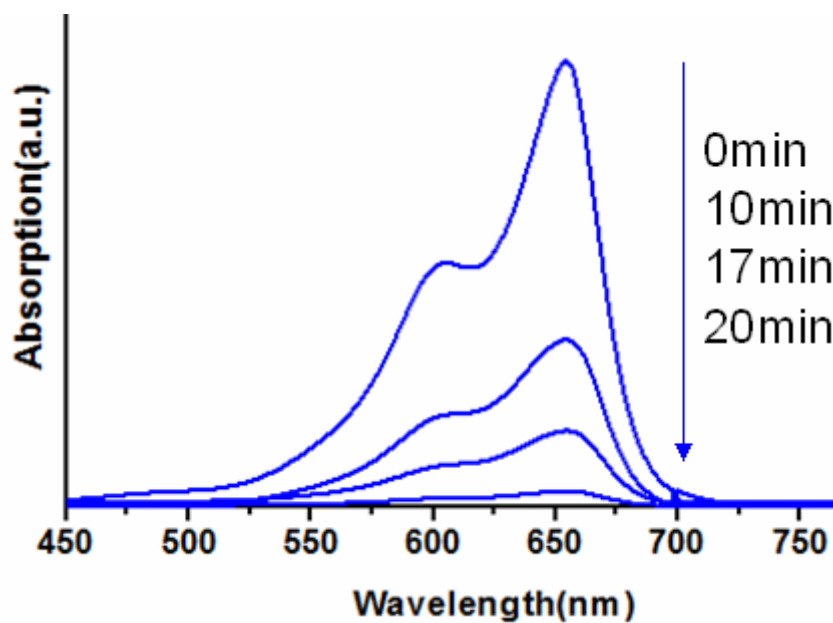

**Fig. S7** Time dependent UV/Vis spectra of MB over photocatalyst 1.

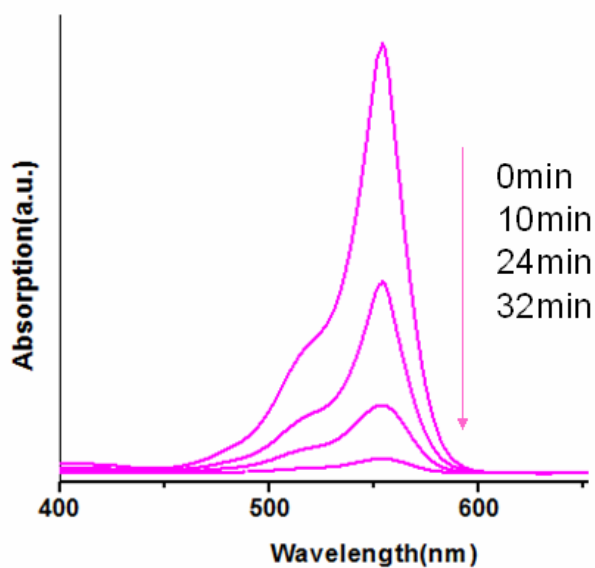

**Fig. S8** Time dependent UV/Vis spectra of RhB over photocatalyst 1.

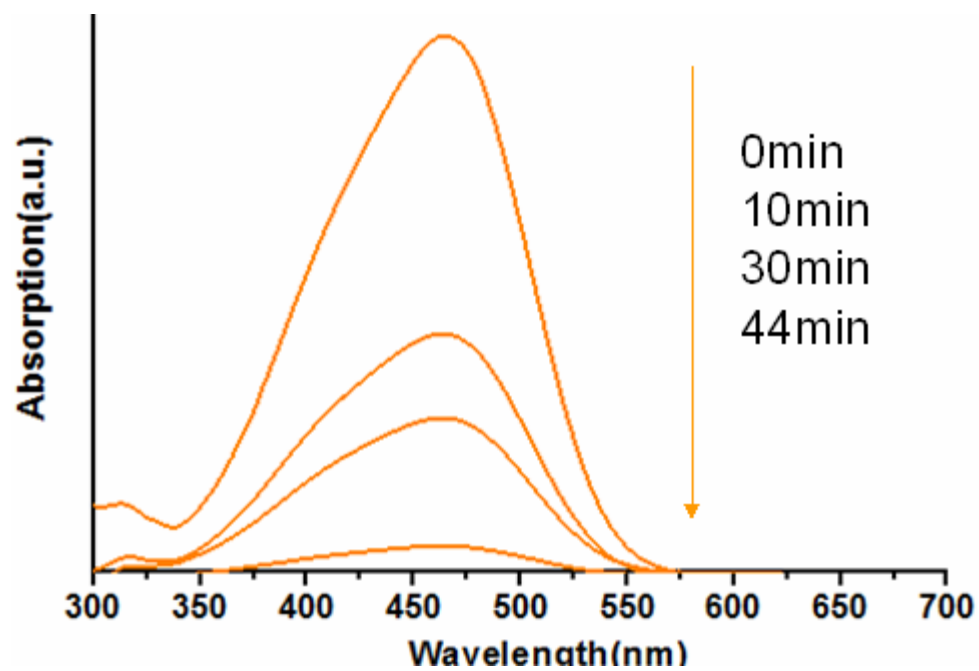

Fig. S9 Time dependent UV/Vis spectra of MO over photocatalyst 1.

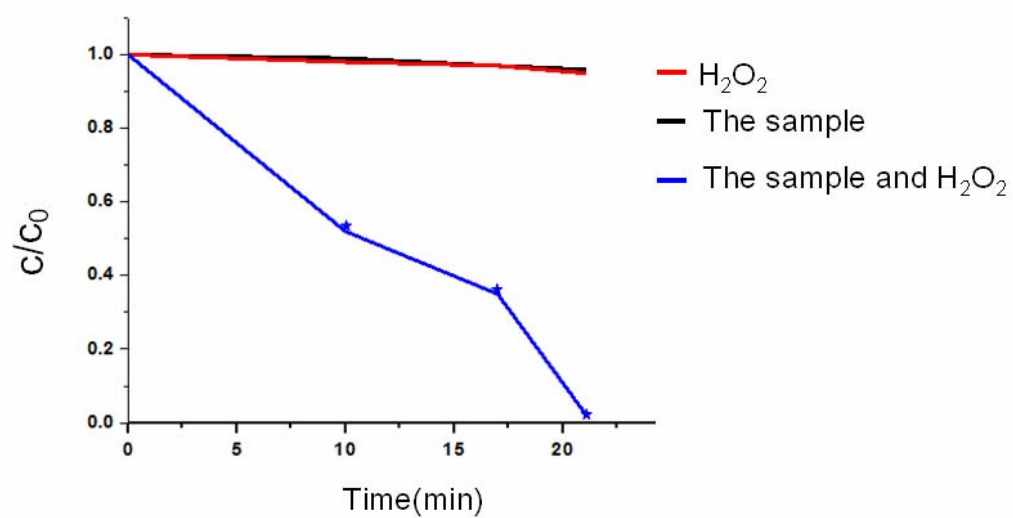

Fig. S10 Photodecomposition of MB dye in solution over different condition with fluorescent light.

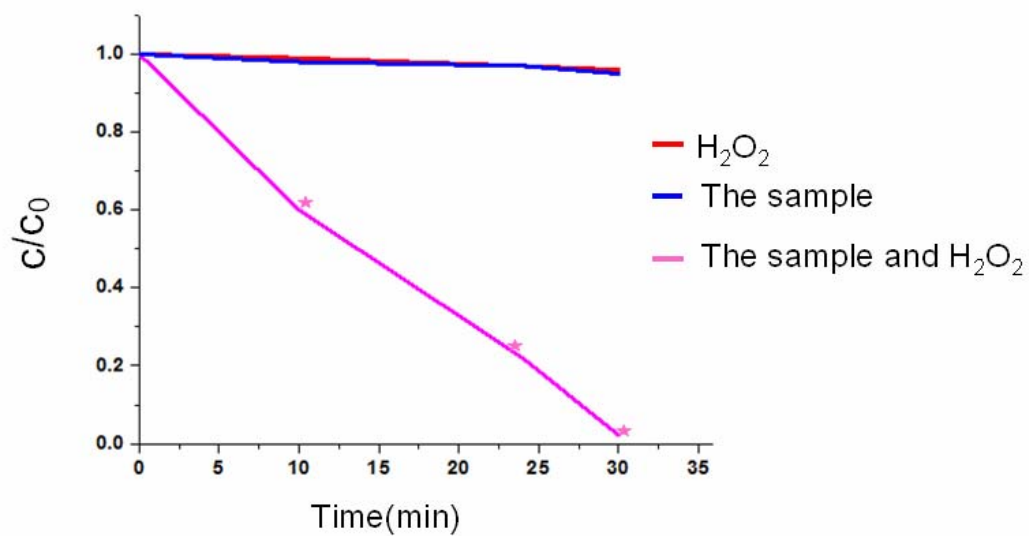

**Fig. S11** Photodecomposition of RhB dye in solution over different condition with fluorescent light.

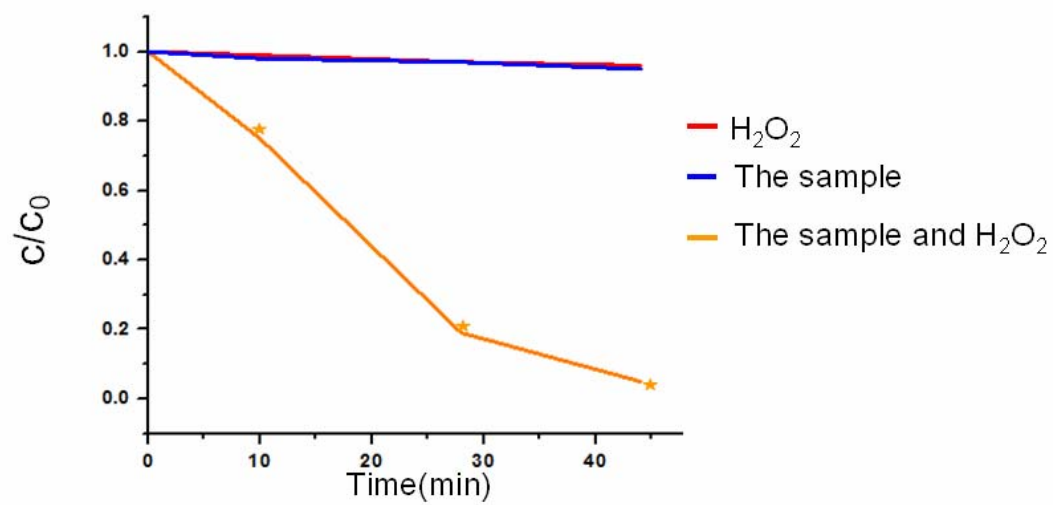

**Fig. S12** Photodecomposition of MO dye in solution over different condition with fluorescent light.



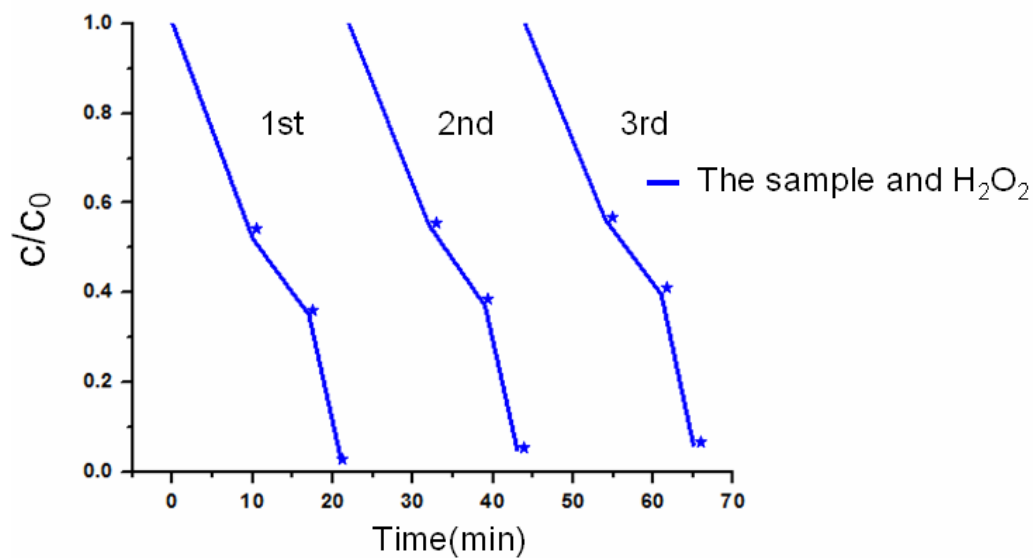

Fig. S13 Recycling test on **1** for MB photodegradation under fluorescent light irradiation.

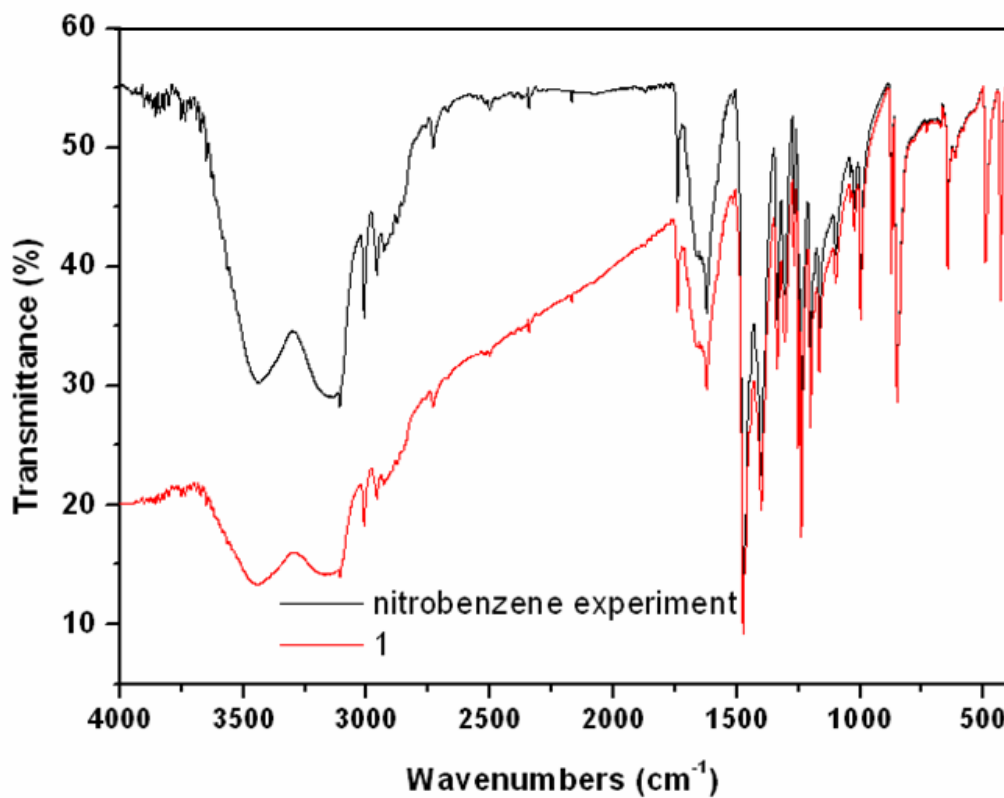

Fig. S14 IR spectra (4000-500  $cm^{-1}$ ) of **1** (red) and its sample upon immersion in nitrobenzene (black). Two spectra almost keep the same effect.

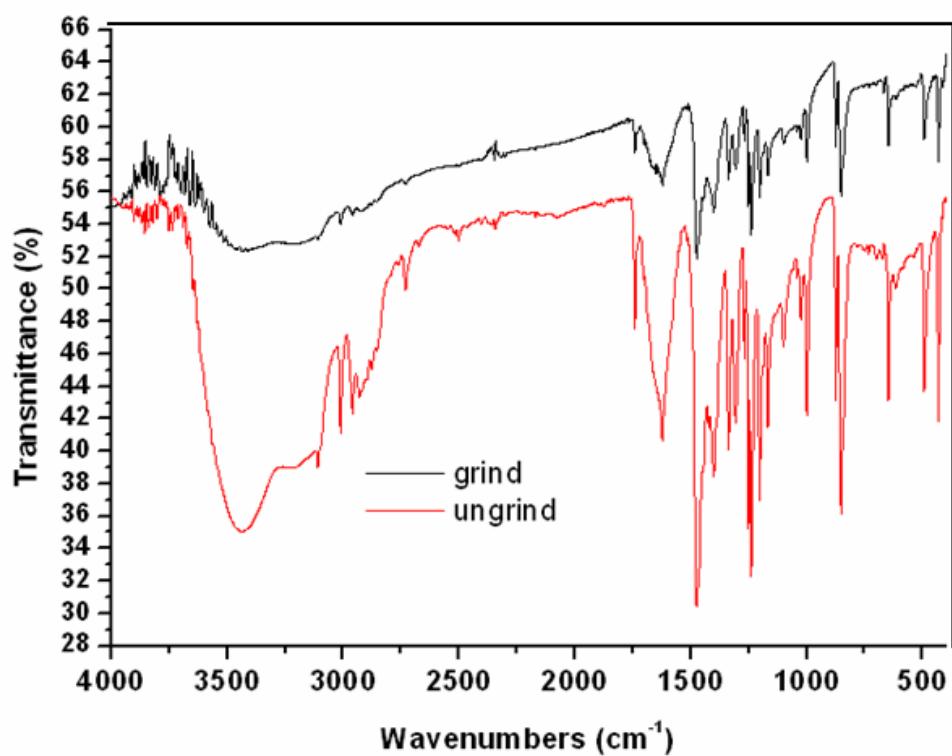

**Fig. S15** IR spectra (4000-500 cm<sup>-1</sup>) of **1** (red) and ground sample (black). Two spectra almost keep the same effect.

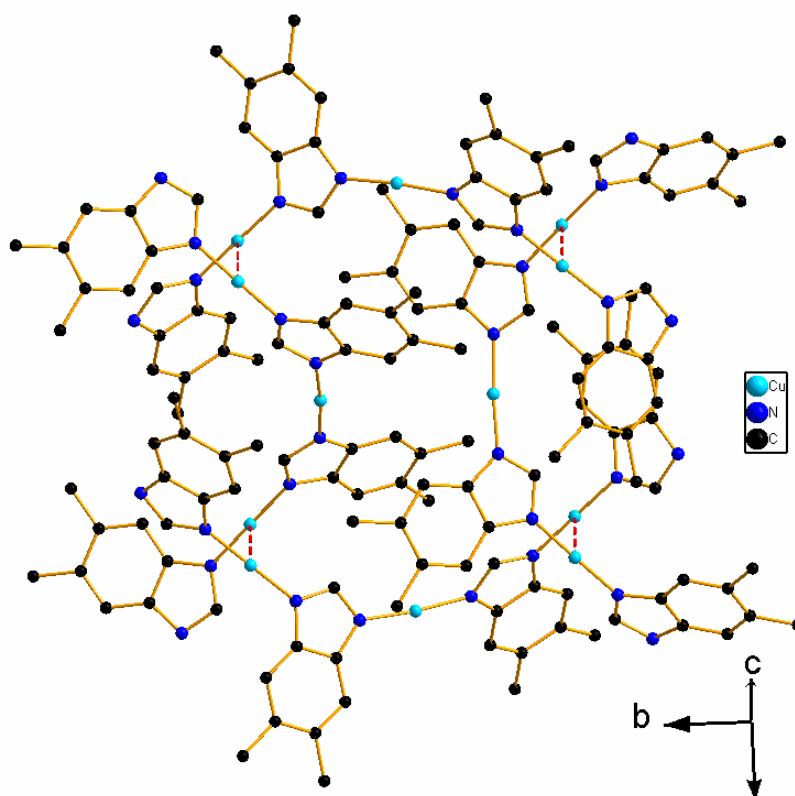

**Fig. S16** The Cu...Cu interactions between helical chains (red dashed line).
